# Supplementary material for: Heterolytic and heterotopic dissociation of hydrogen on ceria-supported gold nanoparticles. Combined inelastic neutron scattering and FT-IR spectroscopic study on the nature and reactivity of surface hydrogen species
Source: Royal Society of Chemistry journal article supplement (doi:10.1039/c0sc00336k), 2010-01-01

## SUPPLEMENTARY INFORMATION

### Heterolytic and heterotopic dissociation of hydrogen on ceria-supported gold nanoparticles. Combined inelastic neutron scattering and FT-IR spectroscopic study on the nature and reactivity of surface hydrogen species

Raquel Juárez,<sup>a</sup> Stewart F. Parker,<sup>b</sup> Patricia Concepción,<sup>a</sup> Avelino Corma<sup>a</sup> and Hermenegildo García<sup>a\*</sup>

Figure S1. IR spectra of Au/CeO<sub>2</sub> catalysts upon exposure to 50 mbar H<sub>2</sub> (a) or D<sub>2</sub> (b) at 423K. Inset: Expansion of the Au-H IR band after adding 50 mbar H<sub>2</sub> or D<sub>2</sub>. Activation of the sample the same in both cases. Spectra normalized to sample weight.

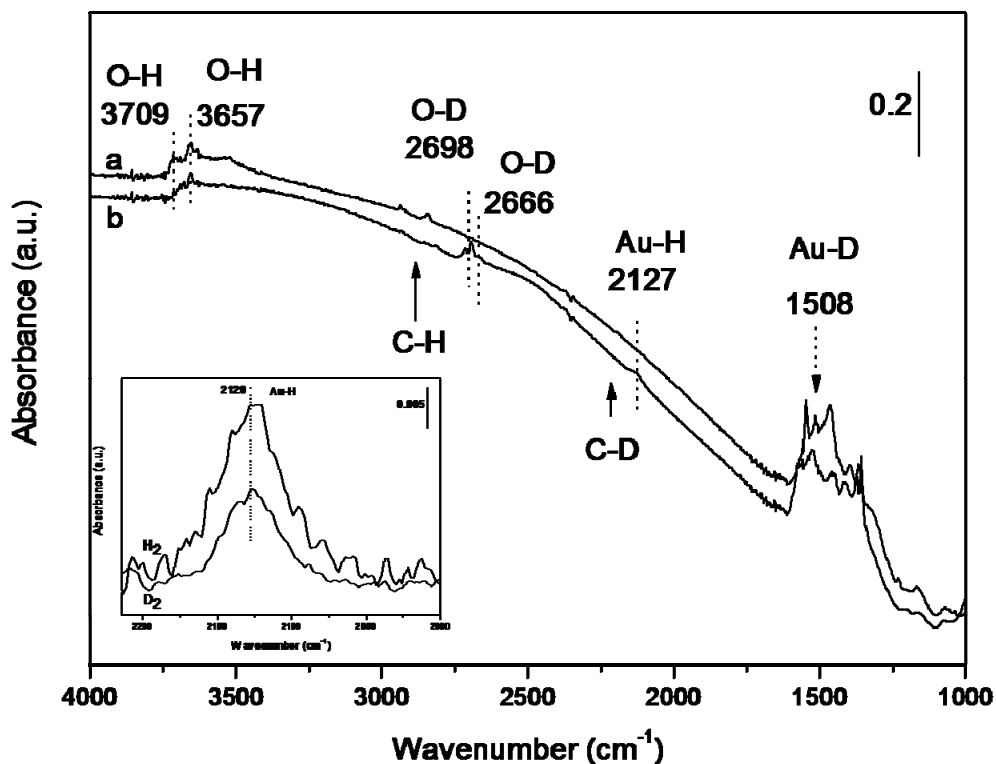

Figure S2. Left: IR spectra of the Au/CeO<sub>2</sub> sample after a) 50 mbar H<sub>2</sub> at 423 K for 2h and evacuated at 323 K; b) subsequent exposure to 50 mbar <sup>18</sup>O<sub>2</sub> at 298 K; c) further evacuation at 423 K. Right: Comparative IR spectra of the Au/CeO<sub>2</sub> sample after 50 mbar <sup>16</sup>O<sub>2</sub> adsorption at 298 K (a) an further evacuation at 423 K (b). The same spectra after adsorption of 50 mbar <sup>18</sup>O<sub>2</sub> (a and b). Activation of the sample the same in both cases.

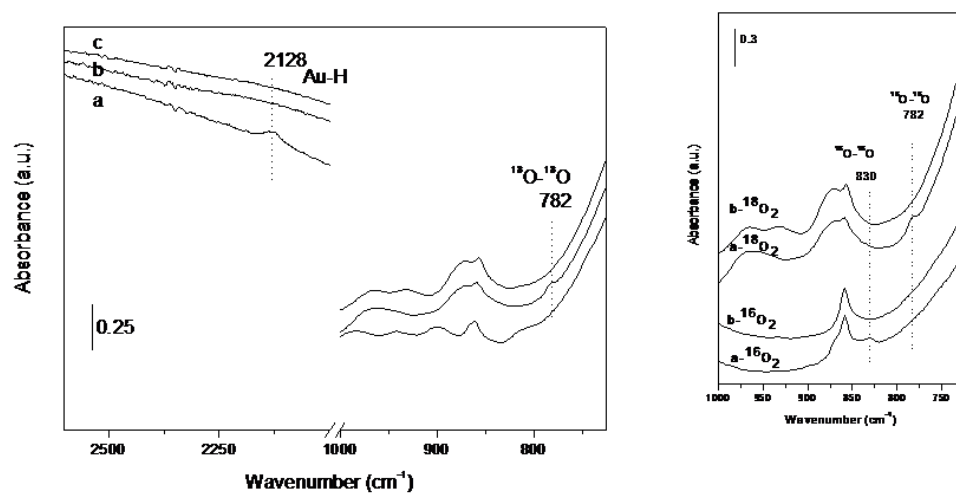

Supplement: c0sc00336k.pdf [file c0sc00336k.pdf]
